# Supplementary material for: Peptides from Antarctic krill (Euphausia superba) ameliorate acute liver injury in mice induced by carbon tetrachloride via activating the Nrf2/HO-1 pathway
Source: Royal Society of Chemistry journal article supplement (doi:10.1039/d2fo03269d), 2023-01-01
Supplement: d2fo03269d1.pdf [file d2fo03269d1.pdf]

**Table S1** Effects of AKP on liver Index in mice

| Group   | Body weight | Liver weight            | Liver weight/body weight (%) |
|---------|-------------|-------------------------|------------------------------|
| Control | 32.48±1.77  | 1.29±0.16               | 3.97±0.33                    |
| Model   | 33.44±3.34  | 1.98±0.13 <sup>##</sup> | 5.68±0.15 <sup>##</sup>      |
| Silybin | 30.02±0.49  | 1.51±0.08 <sup>*</sup>  | 5.00±0.21 <sup>**</sup>      |
| AKP     | 30.05±2.70  | 1.52±0.13 <sup>*</sup>  | 5.14±0.19 <sup>**</sup>      |

Note: #  $P < 0.05$ , and ##  $P < 0.01$  compared with the Control group, and \*  $P < 0.05$ , and \*\*  $P < 0.01$

compared with the Model group. Data are given as the mean ± SEM (n = 8).

**Table S2** Primers used for the quantitative RT-PCR analysis

| Gene    | Forward primer              | Reverse primer              |
|---------|-----------------------------|-----------------------------|
| CYP2E1  | 5'-CCGACCTGTTCTTTGCAGGA-3'  | 5'-GGCTTGGCCCAATAACCCTG-3'  |
| Keap1   | 5'-CGCTGTGCTTAGTCACCGT-3'   | 5'-GCATGGGGTTCCTGATGACA-3'  |
| Nrf2    | 5'-CACATCCAGACAGACACCAGT-3' | 5'-CTTGTTTGGGAATGTGGGCA-3'  |
| HO-1    | 5'-ACAGAAGAGGCTAAGACCGC-3'  | 5'-GACGAAGTGACGCCATCTGT-3'  |
| NQO1    | 5'-ACGACAACGGTCCTTTCCAG-3'  | 5'-ATGACGTTTCATGTCCCCGTG-3' |
| β-actin | 5'-GGCTGTATTCCCCTCCATCG-3'  | 5'-GTTGGGGTTTGCCTCTCCC-3'   |
