# Supplementary figures and images for: Peptides from Antarctic krill (Euphausia superba) ameliorate acute liver injury in mice induced by carbon tetrachloride via activating the Nrf2/HO-1 pathway
Source: Royal Society of Chemistry journal article supplement (doi:10.1039/d2fo03269d), 2023-01-01

1.

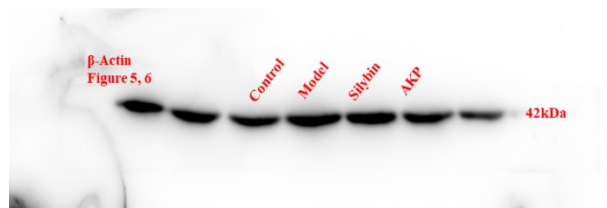

2.

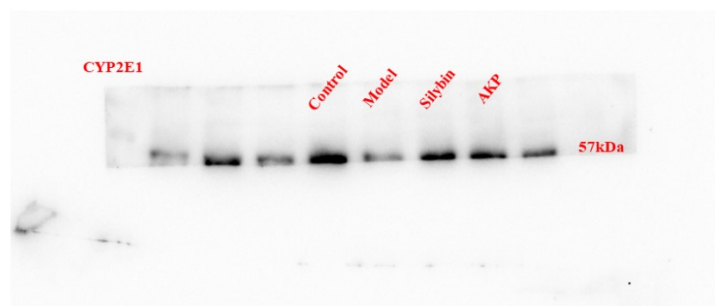

3.

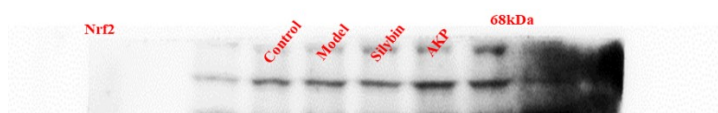

4.

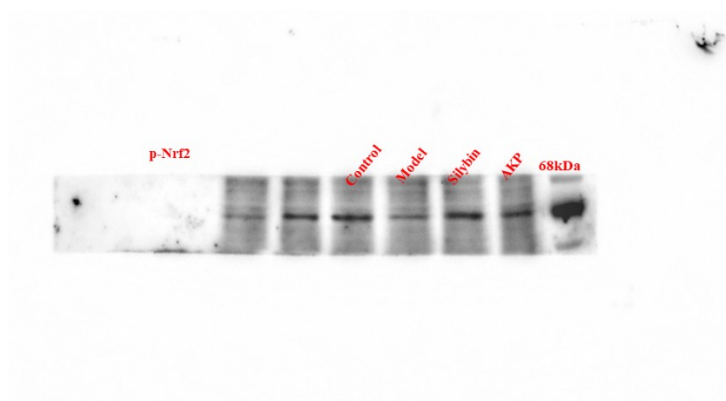

5.

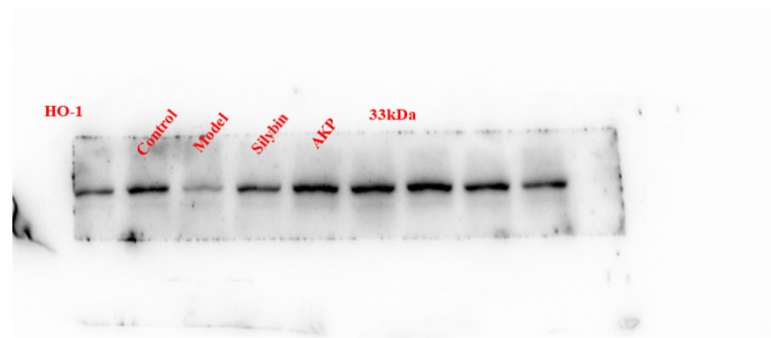

6.

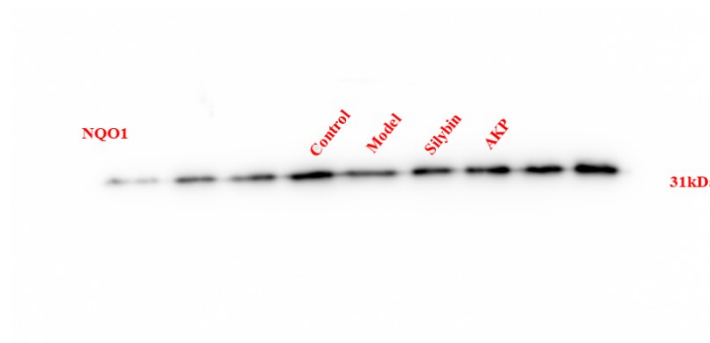

Supplement: d2fo03269d2.pdf [file d2fo03269d2.pdf]
